# Supplementary material for: Infantile Convulsions with Paroxysmal Dyskinesia (ICCA Syndrome) and Copy Number Variation at Human Chromosome 16p11
Source: PubMed Central journal article supplement (PMC2966418; doi:10.1371/journal.pone.0013750), 2010-10-29

**Figure S2.** Dendrogram from hierarchical cluster analysis of nine ICCA patients and 50 controls (numbered from n°11 to n°60). All nine ICCA patients studied are indicated as follows: pedigree symbol/individual ID. Two clusters (Cluster 1 and Cluster 2, boxed) could be statistically separated from each other and from all other Dct values ( $p < 0.0001$  for ICCA.SRa and ICCA.SRb, Kruskal Wallis test).

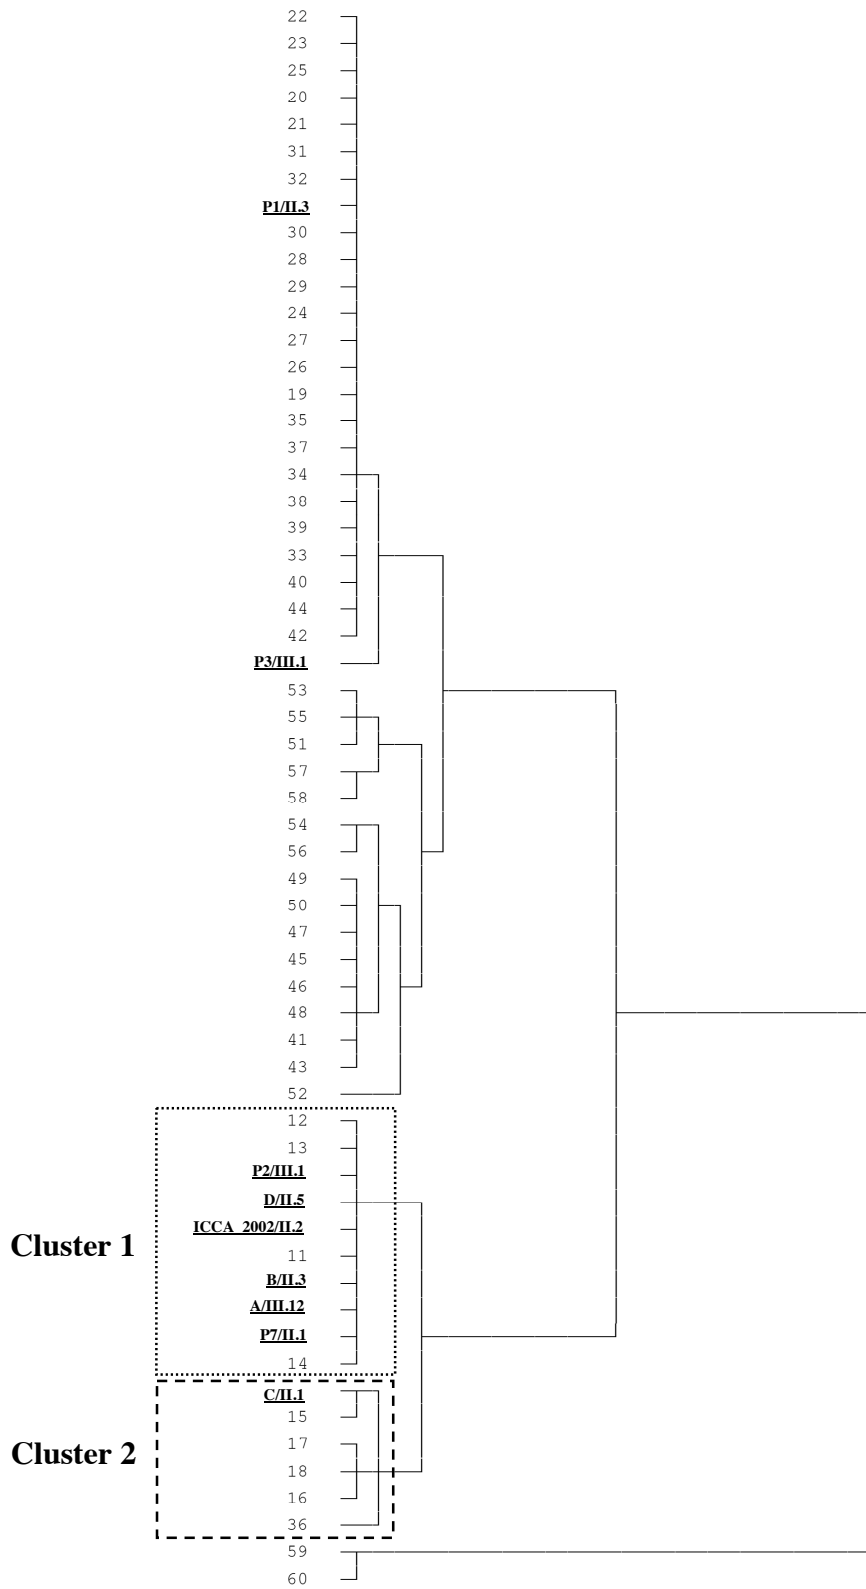

Supplement: pone.0013750.s002.pdf [file pone.0013750.s002.pdf]
