# Supplementary material for: Infantile Convulsions with Paroxysmal Dyskinesia (ICCA Syndrome) and Copy Number Variation at Human Chromosome 16p11
Source: PubMed Central journal article supplement (PMC2966418; doi:10.1371/journal.pone.0013750), 2010-10-29

**Figure S3.** Quantitative PCR study of the ICCA.SRb subregion in the largest ICCA family (Pedigree A).[2] DCt values are indicated for each individual carrying (asterisk) or not the disease haplotype. Black circles and squares indicate females and males affected with benign infantile convulsions (left-filled), paroxysmal dyskinesia (right-filled), or both (fully filled). Empty circles and squares indicate unaffected females and males, respectively.

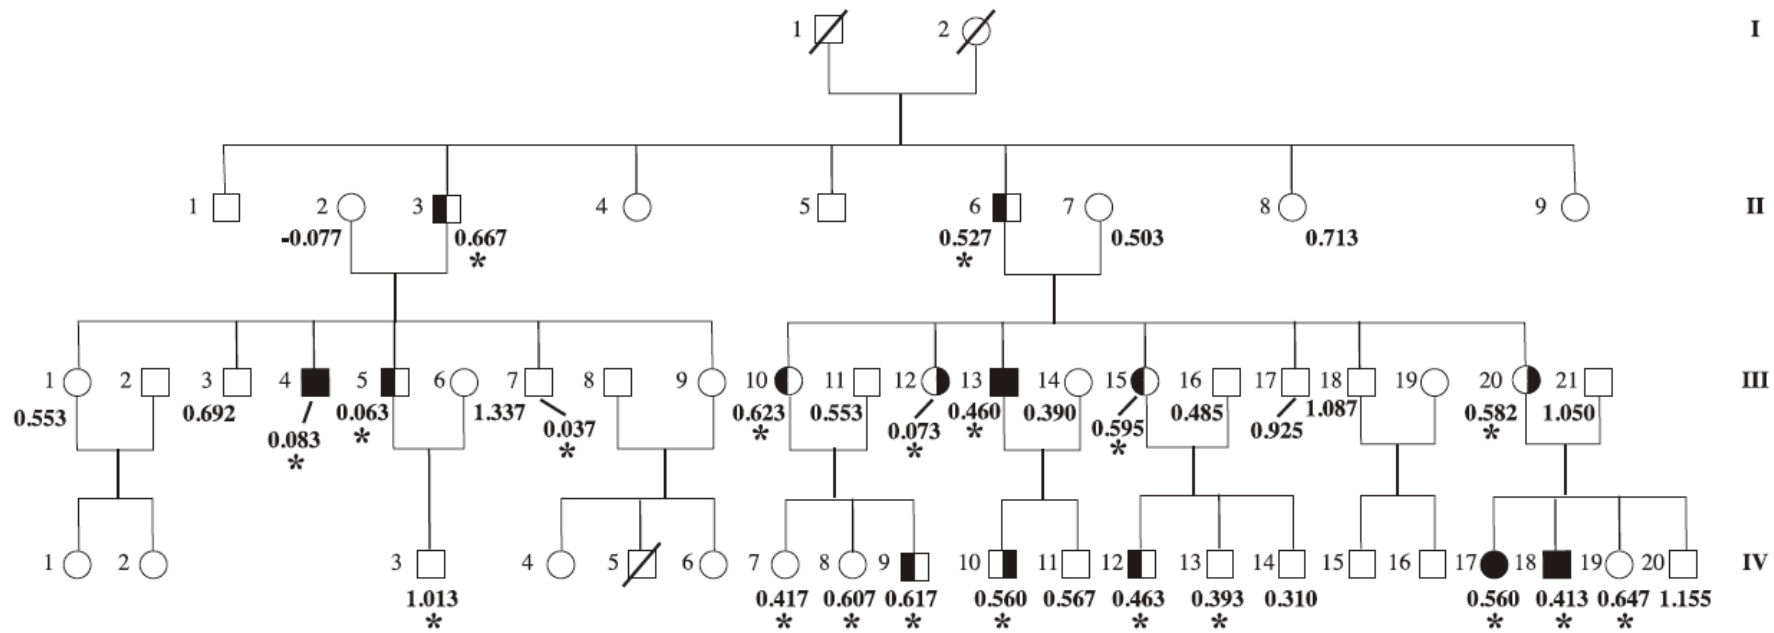

Supplement: pone.0013750.s003.pdf [file pone.0013750.s003.pdf]
